# Supplementary material for: Aggregation-induced emission luminogen based self-healing hydrogels fluorescent sensors for α-amylase
Source: Royal Society of Chemistry journal article supplement (doi:10.1039/d1py01505b), 2021-12-28
Supplement: d1py01505b1.pdf [file d1py01505b1.pdf]

# Supporting Information

## $\alpha$ -Amylase lighted aggregation-induced emission luminogens based self-healing hydrogels

Lili Cai <sup>a</sup>, Xueru Xiong <sup>b,c</sup>, Mingyu Qiao <sup>a</sup>, Jianwei Guo <sup>a,\*</sup>, Huatang Zhang <sup>a,\*</sup>, Jiawei

Lin <sup>b,c</sup>, Sa Liu <sup>b,c</sup>, Yong-Guang Jia <sup>b,c\*</sup>

<sup>a</sup>School of Chemical Engineering and Light Industry, Guangdong University of Technology, Guangzhou 510006, China

<sup>b</sup>School of Materials Science and Engineering, South China University of Technology, Guangzhou, 510641, China

<sup>c</sup>National Engineering Research Center for Tissue Restoration and Reconstruction, South China University of Technology, Guangzhou 510006, China

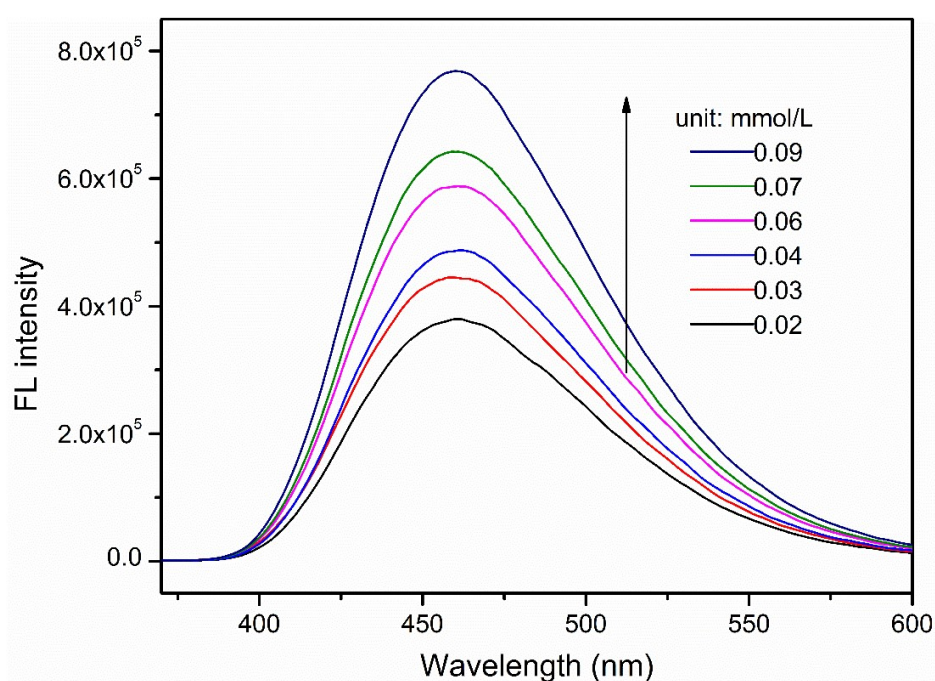

**Figure S1.** Fluorescence intensity changes ( $\lambda_{\text{ex}} = 320 \text{ nm}$ ) of various PLGA-TPE concentrations from 0.02 to 0.09 mmol/L in water at room temperature.

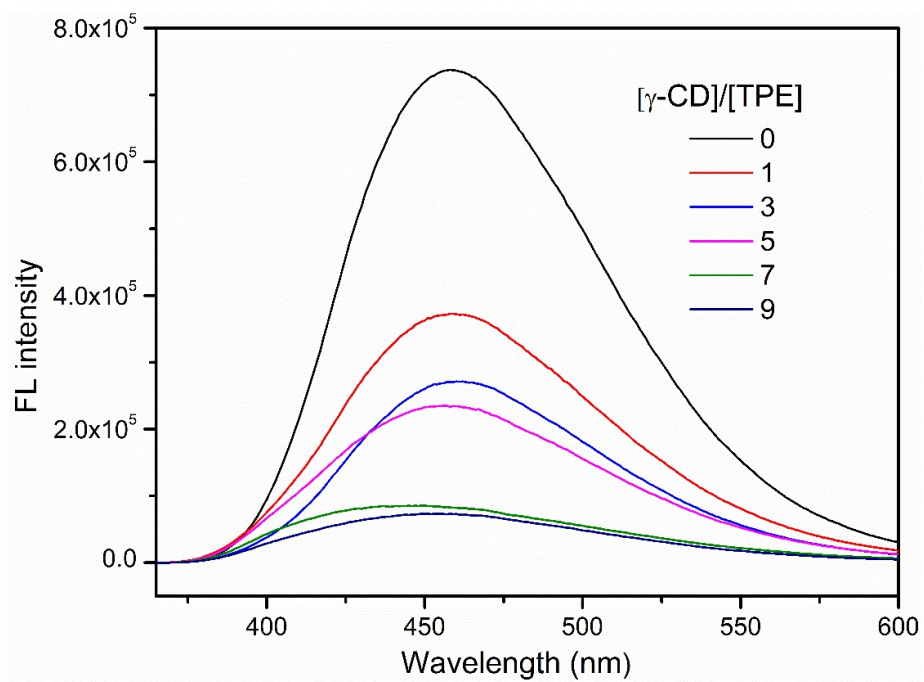

**Figure S2.** Fluorescence emission ( $\lambda_{\text{ex}} = 320 \text{ nm}$ ) of PLGA-TPE in the presence of different molar ratios of Ac- $\gamma$ -CD to TPE units ( $[\text{TPE}] = 0.09 \text{ mmol/L}$ ) at room temperature for 24 h.

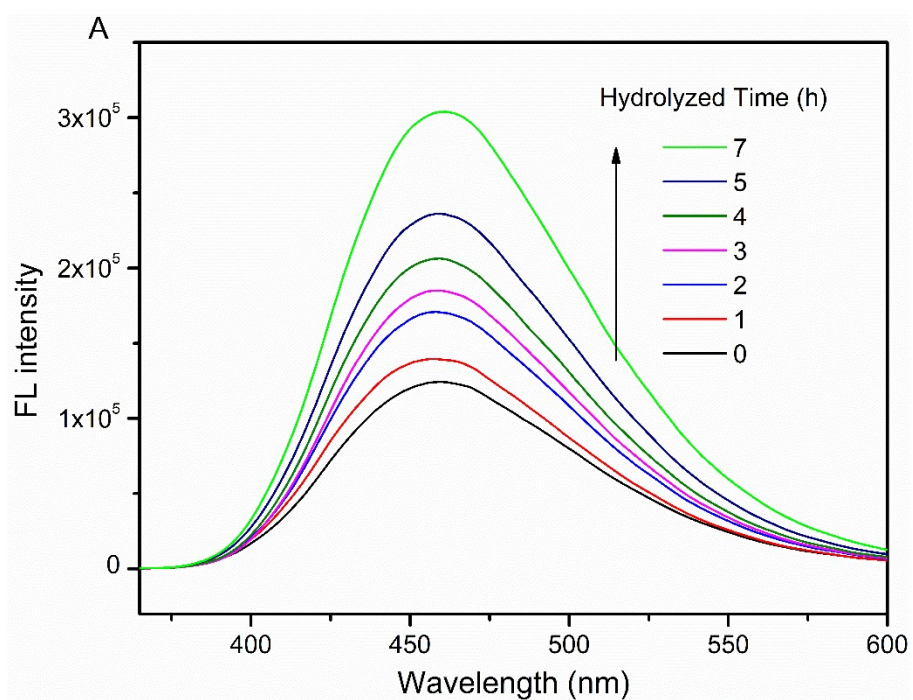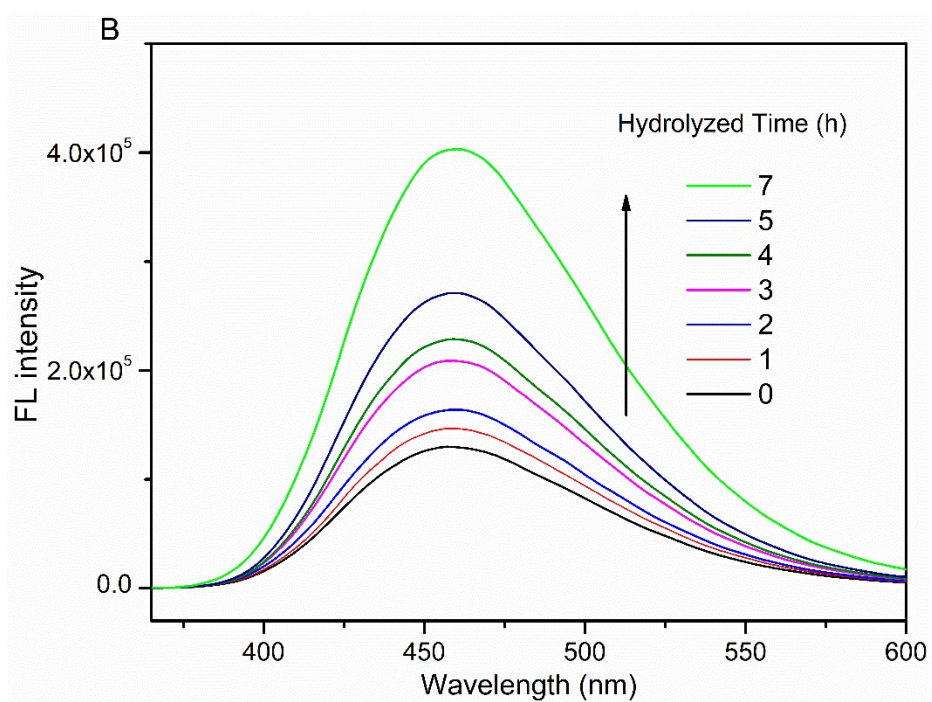

**Figure S3.** Fluorescence spectra of DN hydrogel with different incubate time in the presence of 0.5 U/mL (A), 1 U/mL (B)  $\alpha$ -amylase buffer (0.1 mM MES buffer, pH 6.0).

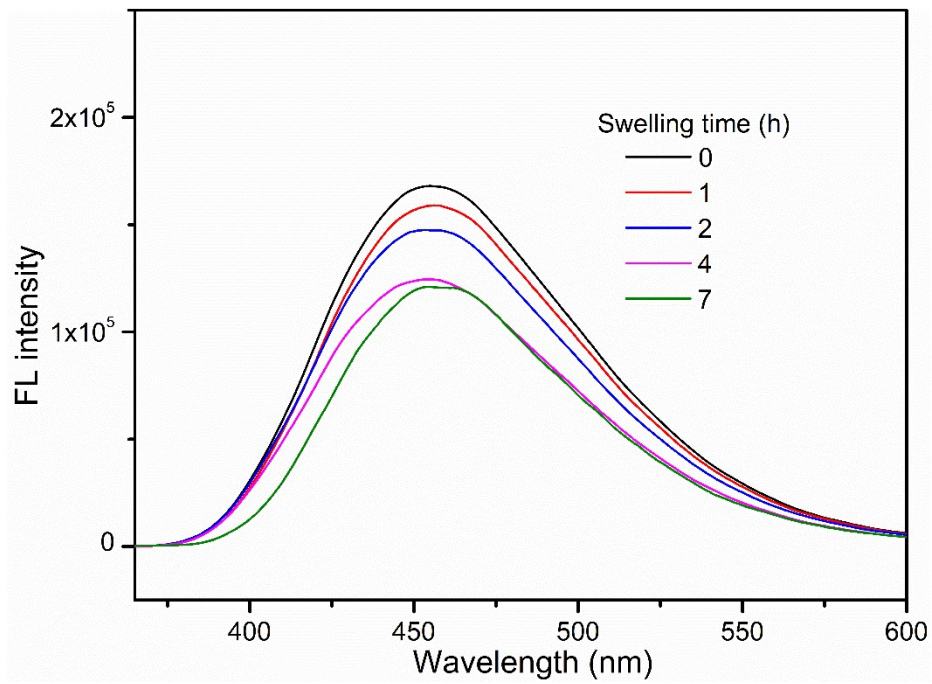

**Figure S4.** Fluorescence emission ( $\lambda_{\text{ex}} = 320 \text{ nm}$ ) of DN hydrogel in the presence of different swelling time in water.
